# Supplementary material for: Primary Tumor Resection for Metastatic Colorectal, Gastric and Pancreatic Cancer Patients: In Search of Scientific Evidence to Inform Clinical Practice
Source: MDPI journal article supplement (doi:10.3390/cancers15030900), 2023-01-31
Supplement: s1 [file s1]

**Table S1. Most relevant studies addressing the management of primary tumor in patients with metastatic colorectal cancer**

| Study            | Study type                                      | Enrollment interval | Patients            |                         | Rectal cancer (% of all patients) | Median overall survival (months)      |                          |                     | Chemotherapy regimens                                                          |
|------------------|-------------------------------------------------|---------------------|---------------------|-------------------------|-----------------------------------|---------------------------------------|--------------------------|---------------------|--------------------------------------------------------------------------------|
|                  |                                                 |                     | Resection group (N) | Non-resection group (N) |                                   | Resection group                       | Non-resection group      | P value             |                                                                                |
| Xu et al.        | Retrospective, large database                   | 1988-2010           | 27931               | 16583                   | 34                                | 16                                    | 7                        | HR 0.45 (0.44-0.46) | CT regimen not specified                                                       |
| Konyalian et al. | Retrospective, single center                    | 1991-2002           | 62                  | 47                      | 26                                | 12.5                                  | 4.6                      | <0.001              | NR                                                                             |
| Ahmed et al.     | Retrospective cohort study                      | 1992-2005           | 944                 | 434                     | 30                                | Resection of PT + CT: 18.3            | Only CT: 8.4             | <0.0001             | 5-FU-based chemotherapy                                                        |
| Ahmed et al.     | Retrospective                                   | 1992-2005           | 521                 | 313                     | 33                                | 19.7<br>29.4                          | 8.4<br>16.0              | <0.0001<br><0.001   | 5-FU-LV<br>Oxaliplatin- or irinotecan-based                                    |
| Beham et al.     | Retrospective, single center                    | 1993-2003           | 46                  | 21                      | 43                                | 18.1                                  | 7.8                      | <0.001              | CT regimen not specified                                                       |
| Duraker et al.   | Prospective cohort study                        | 1993-2004           | 110                 | 54                      | 46                                | 11.0                                  | 5.5                      | <0.001              | 5-FU-based                                                                     |
| Costi et al.     | Retrospective, single center                    | 1994-2003           | 83                  | 47                      | 21                                | 9                                     | 4                        | <0.001              | No CT.                                                                         |
| Stelzner et al.  | Retrospective, single center                    | 1995-2001           | 82                  | 25                      | 39                                | 11.7                                  | 5.2                      | 0.0002 (univariate) | 5-FU-based                                                                     |
| Galizia et al.   | Retrospective, single center                    | 1995-2005           | 42                  | 23                      | 18                                | 15.2                                  | 12.3                     | 0.03                | 5-FU-based/Oxaliplatin/Irinotecan                                              |
| Ruo et al.       | Retrospective, single center                    | 1996-1999           | 127                 | 103                     | 32                                | 16.0                                  | 9.0                      | <0.001              | CT regimen not specified<br>Radiation                                          |
| Mik et al.       | Retrospective, single center                    | 1996-2000           | 52                  | 82                      | 48                                | 21                                    | 14                       | 0.004               | 5-FU-LV                                                                        |
| Tsang et al.     | Retrospective, large database                   | 1996-2007           | 8599                | 3117                    | 20                                | 21                                    | 10                       | <0.0001             | CT regimen not specified                                                       |
| Ferrand et al.   | Post-hoc analysis of a multicenter RT           | 1997-2001           | 156                 | 60                      | 20                                | 16.3                                  | 9.5                      | <0.0001             | 5-FU-LV ± Raltitrexed                                                          |
| Ishihara et al.  | Retrospective, multicenter                      | 1997-2007           | 1782                | 200                     | 23                                | 17.2 (CSS)                            | 6.4 (CSS)                | <0.01               | CT regimen not specified                                                       |
| Faron et al.     | Pooled analysis of individual data from four RT | 1997-2008           | 478                 | 332                     | 18                                | 19.2                                  | 13.3                     | <0.001              | 5-FU-LV/Raltitrexed/FOLFOX/<br>FOLFIRI ± bevacizumab/<br>XELIRI + bevacizumab/ |
| Kaufman et al.   | Retrospective, single center                    | 1998-2003           | 115                 | 69                      | 28                                | 22.0 (surgery)<br>30.0 (surgery + CT) | 3.0 (no CT)<br>15.0 (CT) | <0.0001<br><0.00041 | CT regimen not specified                                                       |
| Aslam et al.     | Retrospective, single center                    | 1998-2007           | 366                 | 281                     | 35                                | 14.5                                  | 5.8                      | <0.001              | CT regimen not specified                                                       |
| Karoui et al.    | Retrospective, multicenter                      | 1998-2007           | 85                  | 123                     | 0                                 | 30.7                                  | 21.9                     | 0.031               | Oxaliplatin-or irinotecan-containing<br>± anti-VEGFR/anti-EGFR drug            |
| Tarantino et al. | Retrospective, large database                   | 1998-2009           | 23004               | 14789                   | 19                                | NR                                    | NR                       | HR 0.40<br>P<0.001  | CT regimen not specified                                                       |

|                    |                                         |                        |            |            |          |                             |              |                    |                                                                                                   |
|--------------------|-----------------------------------------|------------------------|------------|------------|----------|-----------------------------|--------------|--------------------|---------------------------------------------------------------------------------------------------|
| Bajwa et al.       | Retrospective, single center            | 1999-2005              | 32         | 35         | NR       | 14.0                        | 6.0          | 0.005              | 5-FU-based/Oxaliplatin/Irinotecan                                                                 |
| Chan et al.        | Retrospective, population-based cohort  | 2000-2002              | 286        | 125        | 24       | 14.0                        | 6.0          | <0.001             | 5-FU<br>Irinotecan                                                                                |
| Yoon et al.        | Prospective cohort study, single center | 2000-2007              | 195        | 66         | 42       | 21                          | 10           | <0.001             | FOLFOX/FOLFIRI/XELOX/XELIRI/<br>5-FU-LV/capecitabine<br>± bevacizumab, cetuximab                  |
| Park et al.        | Retrospective, single center            | 2000-2009              | 527        | 320        | NR       | 21.4                        | 14.1         | <0.001             | Oxaliplatin/Irinotecan/capecitabine<br>± bevacizumab/cetuximab                                    |
| Ahn et al.         | Retrospective, single center            | 2001-2009              | 28         | 36         | 25       | 12.43                       | 3.58         | <0.001             | 5-FU-LV/FOLFOX/FOLFIRI                                                                            |
| Venderbosch et al. | Retrospective analysis of two RT        | 2003-2004<br>2005-2006 | 258<br>289 | 141<br>159 | 26<br>19 | 16.7<br>20.7                | 11.4<br>13.4 | <0.0001<br><0.0001 | Capecitabine + Oxaliplatin + Irinotecan<br>Capecitabine + Oxaliplatin+<br>Bevacizumab ± Cetuximab |
| Gulack et al.      | Retrospective, large database           | 2003-2006              | 231        | 1215       | 40       | 9.2                         | 7.6          | <0.01              | CT regimen not specified                                                                          |
| Tanoue et al.      | Retrospective, single center            | 2005-2009              | 38         | 36         | 47       | 30.6                        | 20.8         | 0.0094             | FOLFOX/FOLFIRI<br>± bevacizumab/cetuximab                                                         |
| Ichikawa et al.    | Retrospective, single center            | 2005-2010              | 37         | 58         | NR       | 30.7                        | 21.9         | 0.031              | CT regimen not specified                                                                          |
| Gresham et al.     | Retrospective, multicenter              | 2006-2008              | 378        | 139        | 24       | 17.9                        | 7.9          | <0.0001            | FOLFOX/FOLFIRI ± bevacizumab/<br>capecitabine/5FU                                                 |
| Ahmed et al.       | Retrospective, single center            | 2006-2010              | 313        | 256        | 33       | Resection of<br>PT + CT: 27 | Only CT: 14  | <0.001             | FOLFOX/FOLFIRI ± bevacizumab/<br>cetuximab/panitumumab                                            |
| Kim et al.         | Retrospective, single center            | 2006-2010              | 72         | 252        | 30       | 17.2                        | 13.6         | 0.002              | Oxaliplatin-based or irinotecan-based<br>± anti-VEGF/anti-EGFR                                    |
| 't Lam-Boer et al. | Retrospective, large database           | 2008-2011              | 2746       | 3345       | 23       | 17.2                        | 11.5         | <0.001             | CT regimen not specified                                                                          |
| Wong et al.        | Retrospective, large database           | 2009-2015              | 216        | 394        | 24       | 21                          | 17           | 0.014              | CT regimen not specified<br>± bevacizumab/cetuximab                                               |
| Wang et al.        | Prospective cohort study, single center | 2011-2013              | 118        | 73         | 40       | 22.5                        | 17.8         | <0.01              | FOLFOX/XELOX/FOLFIRI<br>+ bevacizumab                                                             |

5-FU: 5-fluorouracil; BSC: best supportive care; CSS: cancer-specific survival; CT: chemotherapy; HR: hazard ratio; LV: leucovorin; PT: primary tumor; RT: randomized trial.

Xu H, Xia Z, Jia X, et al. Primary tumor resection is associated with improved survival in stage IV colorectal cancer: an instrumental variable analysis. *Sci Rep.* 2015;5:16516.

Konyalian VR, Rosing DK, Haukoos JS, et al. The role of primary tumour resection in patients with stage IV colorectal cancer. *Colorectal Dis.* 2007;9:430–437.

Ahmed S, Leis A, Fields A, et al. Survival impact of surgical resection of primary tumor in patients with stage IV colorectal cancer: results from a large population-based cohort study. *Cancer.* 2014;120(5):683-91.

Ahmed S, Fields A, Pahwa P, et al. Surgical Resection of Primary Tumor in Asymptomatic or Minimally Symptomatic Patients With Stage IV Colorectal Cancer: A Canadian Province Experience. *Clin Colorectal Cancer*. 2015;14(4):e41-7.

Beham A, Rentsch M, Püllmann K, et al. Survival benefit in patients after palliative resection vs non-resection colon cancer surgery. *World J Gastroenterol*. 2006;12:6634–6638.

Duraker N, Civelek Çaynak Z, et al. The impact of primary tumor resection on overall survival in patients with colorectal carcinoma and unresectable distant metastases: a prospective cohort study. *Int J Surg*. 2014;12:737–741.

Costi R, Mazzeo A, Di Mauro D, et al. Palliative resection of colorectal cancer: does it prolong survival? *Ann Surg Oncol*. 2007;14:2567–2576.

Stelzner S, Hellmich G, Koch R, et al. Factors predicting survival in stage IV colorectal carcinoma patients after palliative treatment: a multivariate analysis. *J Surg Oncol*. 2005;89:211–217.

Galizia G, Lieto E, Orditura M, et al. First-line chemotherapy vs. bowel tumor resection plus chemotherapy for patients with unresectable synchronous colorectal hepatic metastases. *Arch Surg*. 2008;143:352–8.

Ruo L, Gougoutas C, Paty PB, et al. Elective bowel resection for incurable stage IV colorectal cancer: prognostic variables for asymptomatic patients. *J Am Coll Surg*. 2003;196:722–8.

Mik M, Dziki L, Galbfach P, et al. Resection of the primary tumour or other palliative procedures in incurable stage IV colorectal cancer patients? *Colorectal Dis*. 2010;12:e61–e67.

Tsang WY, Ziogas A, Lin BS, et al. Role of primary tumor resection among chemotherapy-treated patients with synchronous stage IV colorectal cancer: a survival analysis. *J Gastrointest Surg*. 2014;18:592–598.

Ferrand F, Malka D, Bourredjem A, et al. Impact of primary tumour resection on survival of patients with colorectal cancer and synchronous metastases treated by chemotherapy: results from the multicenter, randomised trial Fédération Francophone de Cancérologie Digestive 9601. *Eur J Cancer*. 2013;49(1):90-7.

Ishihara S, Nishikawa T, Tanaka T, et al. Benefit of primary tumor resection in stage IV colorectal cancer with unresectable metastasis: a multicenter retrospective study using a propensity score analysis. *Int J Colorectal Dis*. 2015;30:807–812.

Faron M, Pignon JP, Malka D, et al. Is primary tumour resection associated with survival improvement in patients with colorectal cancer and unresectable synchronous metastases? A pooled analysis of individual data from four randomised trials. *Eur J Cancer*. 2015;51:166–176.

Kaufman MS, Radhakrishnan N, Roy R, et al. Influence of palliative surgical resection on overall survival in patients with advanced colorectal cancer: a retrospective single institutional study. *Colorectal Dis*. 2008;10:498–502.

Aslam MI, Kelkar A, Sharpe D, Jameson JS. Ten years experience of managing the primary tumours in patients with stage IV colorectal cancers. *Int J Surg*. 2010;8:305–313.

Karoui M, Roudot-Thoraval F, Mesli F, et al. Primary colectomy in patients with stage IV colon cancer and unresectable distant metastases improves overall survival: results of a multicentric study. *Dis Colon Rectum*. 2011;54:930–938.

Tarantino I, Warschkow R, Worni M, et al. Prognostic relevance of palliative primary tumor removal in 37,793 metastatic colorectal cancer patients: a population-based, propensity score-adjusted trend analysis. *Ann Surg*. 2015;262:112–120.

Bajwa A, Blunt N, Vyas S, et al. Primary tumour resection and survival in the palliative management of metastatic colorectal cancer. *Eur J Surg Oncol*. 2009;35:164–7.

Chan TW, Brown C, Ho CC, et al. Primary tumor resection in patients presenting with metastatic colorectal cancer: analysis of a provincial population-based cohort. *Am J Clin Oncol*. 2010;33:52–5.

- Yoon YS, Kim CW, Lim SB, et al. Palliative surgery in patients with unresectable colorectal liver metastases: a propensity score matching analysis. *J Surg Oncol*. 2014;109: 239–244.
- Park JH, Kim TY, Lee KH, et al. The beneficial effect of palliative resection in metastatic colorectal cancer. *Br J Cancer*. 2013;108:1425–1431.
- Ahn HJ, Oh HS, Ahn Y, et al. Prognostic implications of primary tumor resection in stage IVB colorectal cancer in elderly patients. *Ann Coloproctol*. 2014;30:175–181.
- Venderbosch S, de Wilt JH, Teerenstra S, et al. Prognostic value of resection of primary tumor in patients with stage IV colorectal cancer: retrospective analysis of two randomized studies and a review of the literature. *Ann Surg Oncol*. 2011; 18: 3252-60.
- Gulack BC, Nussbaum DP, Keenan JE, et al. Surgical resection of the primary tumor in stage IV colorectal cancer without metastasectomy is associated with improved overall survival compared with chemotherapy/radiation therapy alone. *Dis Colon Rectum*. 2016;59:299–305.
- Tanoue Y, Tanaka N, Nomura Y. Primary site resection is superior for incurable metastatic colorectal cancer. *World J Gastroenterol*. 2010;16:3561-6.
- Ichikawa Y, Goto A, Kobayashi N, et al. Does resection of primary lesions show survival benefit for stage IV colorectal cancer patients with unresectable metastases? *Hepatogastroenterology*. 2013;60:1945–1949.
- Gresham G, Renouf DJ, Chan M, et al. Association between palliative resection of the primary tumor and overall survival in a population-based cohort of metastatic colorectal cancer patients. *Ann Surg Oncol*. 2014;21:3917–3923.
- Ahmed S, Leis A, Chandra-Kanthan S, et al. Surgical Management of the Primary Tumor in Stage IV Colorectal Cancer: A Confirmatory Retrospective Cohort Study. *J Cancer*. 2016;7(7):837-45.
- Kim MS, Chung M, Ahn JB, et al. Clinical significance of primary tumor resection in colorectal cancer patients with synchronous unresectable metastasis. *J Surg Oncol*. 2014;110: 214–221.
- 't Lam-Boer J, Van der Geest LG, Verhoef C, et al. Palliative resection of the primary tumor is associated with improved overall survival in incurable stage IV colorectal cancer: A nationwide population-based propensity-score adjusted study in the Netherlands. *Int J Cancer*. 2016;139:2082-94.
- Wong SF, Wong HL, Field KM, et al. Primary tumor resection and overall survival in patients with metastatic colorectal cancer treated with palliative intent. *Clin Colorectal Cancer*. 2016;15:e125-32.
- Wang Z, Liang L, Yu Y, et al. Primary tumour resection could improve the survival of unresectable metastatic colorectal cancer patients receiving bevacizumab-containing chemotherapy. *Cell Physiol Biochem*. 2016;39:1239-46.
